# Supplementary material for: Programmable assembly of CdTe quantum dots into microstructures by femtosecond laser direct writing
Source: Royal Society of Chemistry journal article supplement (doi:10.1039/c3tc30666f), 2013-01-01
Supplement: c3tc30666f.pdf [file c3tc30666f.pdf]

## Electronic Supplementary Information (ESI) for

# Programmable assembly of CdTe quantum dots into microstructures by femtosecond laser direct writing

5 **Bin-Bin Xu,<sup>a</sup> Yong-Lai Zhang,<sup>\*a</sup> Ran Zhang,<sup>a</sup> Lei Wang,<sup>a</sup> Xin-Ze Xiao,<sup>a</sup> Hong Xia,<sup>a</sup> Qi-Dai Chen,<sup>a</sup> and Hong-Bo Sun,<sup>\*a,b</sup>**

*Received (in XXX, XXX) Xth XXXXXXXXXX 20XX, Accepted Xth XXXXXXXXXX 20XX*

**DOI: 10.1039/b000000x**

<sup>a</sup> *State Key Laboratory on Integrated Optoelectronics, College of Electronic Science and Engineering, Jilin University, 2699 Qianjin Street, Changchun, 130012, People's Republic of China. Fax: +86-431-85168281 Tel: +86-431-85168281; E-mail: [yonglaizhang@jlu.edu.cn](mailto:yonglaizhang@jlu.edu.cn)*

<sup>b</sup> *College of Physics, Jilin University, 119 Jiefang Road, Changchun, 130023, People's Republic of China. E-mail: [hbsun@jlu.edu.cn](mailto:hbsun@jlu.edu.cn)*

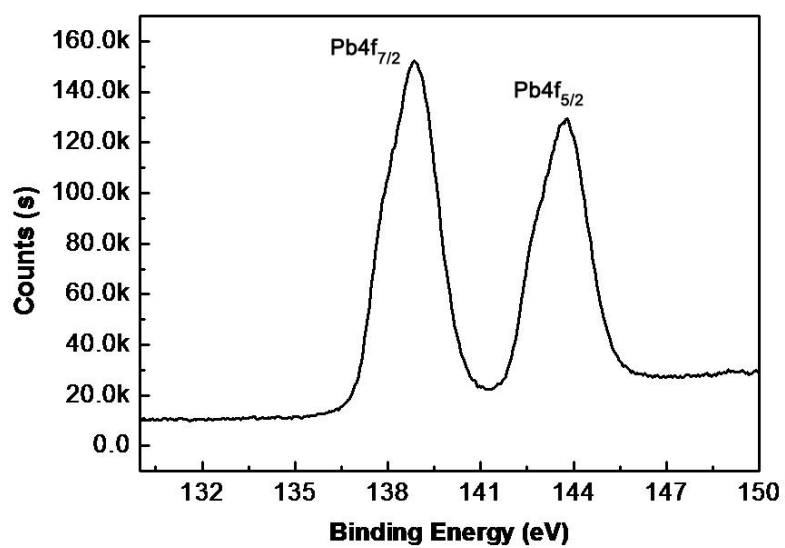

Fig. S1 XPS spectrum of the Pb4f region for the CdTe micropattern reacted with a Pb<sup>2+</sup> solution.
